# Supplementary material for: Remarkable effect of mobile phase buffer on the SEC-ICP-AES derived Cu, Fe and Zn-metalloproteome pattern of rabbit blood plasma
Source: Royal Society of Chemistry journal article supplement (doi:10.1039/c003321a), 2010-01-01
Supplement: c003321a_supplementary_information.pdf [file c003321a_supplementary_information.pdf]

## Remarkable effect of mobile phase buffer on the SEC-ICP-AES derived Cu, Fe and Zn-metalloproteome pattern of rabbit blood plasma

Elham Zeini Jahromi, Wade White, Qiao Wu, Raghav Yamdagni and Jürgen Gailer

Department of Chemistry, University of Calgary, 2500 University Drive NW, Calgary, AB, T2N 1 N4, Canada. Tel: 403-210-8899, Fax: 403-289-9488, e-mail: jgailer@ucalgary.ca

### Supplementary material

|    | PBS-buffer<br>Retention time $\pm$ SD (s), Peak<br>area $\pm$ SD                  | Tris-buffer<br>Retention time $\pm$ SD (s), Peak<br>area $\pm$ SD                                                                          | Hepes-buffer<br>Retention time $\pm$ SD (s), Peak<br>area $\pm$ SD                                                        | Mops-buffer<br>Retention time $\pm$ SD (s), Peak<br>area $\pm$ SD                                                       |
|----|-----------------------------------------------------------------------------------|--------------------------------------------------------------------------------------------------------------------------------------------|---------------------------------------------------------------------------------------------------------------------------|-------------------------------------------------------------------------------------------------------------------------|
| Cu | 829 $\pm$ 12 s                                                                    | 806 $\pm$ 4 s                                                                                                                              | 837 $\pm$ 2 s                                                                                                             | 834 $\pm$ 4 s                                                                                                           |
| Fe | Peak 1: 724 $\pm$ 13 s, 3851 $\pm$ 156<br>peak 2: 914 $\pm$ 11 s, 25366 $\pm$ 190 | peak 1: 708 $\pm$ 4 s, 3106 $\pm$ 174<br>peak 2: 896 $\pm$ 6 s, 26902 $\pm$ 354                                                            | peak 1: 511 $\pm$ 10 s, 5102 $\pm$ 467<br>peak 2: 734 $\pm$ 2 s, 4814 $\pm$ 357<br>peak 3: 920 $\pm$ 3 s, 24889 $\pm$ 674 | peak 1: 490 $\pm$ 10 s, 7359 $\pm$ 727<br>peak 2: 730 $\pm$ 5 s, 3112 $\pm$ 46<br>peak 3: 924 $\pm$ 12, 24518 $\pm$ 251 |
| Zn | peak 1: 683 $\pm$ 26 s<br>peak 2: 811 $\pm$ 13 s<br>peak 3: 919 $\pm$ 11 s        | peak 1: 574 $\pm$ 6 s<br>peak 2: 659 $\pm$ 3 s<br>peak 3: 770 $\pm$ 5 s<br>peak 4: 899 $\pm$ 6 s<br>peak 5: 1184 $\pm$ 7 s, 1699 $\pm$ 107 | peak 1: 581 $\pm$ 11 s<br>peak 2: 694 $\pm$ 5 s<br>peak 3: 795 $\pm$ 4 s<br>peak 4: 927 $\pm$ 4 s                         | peak 1: 564 $\pm$ 20 s<br>peak 2: 684 $\pm$ 5 s<br>peak 3: 793 $\pm$ 5 s<br>peak 4: 934 $\pm$ 18 s                      |
